# Supplementary material for: Cracking during High-Temperature Deformation of a High-Strength Polycrystalline CoNi-Base Superalloy
Source: MDPI journal article supplement (doi:10.3390/met12091520), 2022-09-14
Supplement: s1 [file s1]

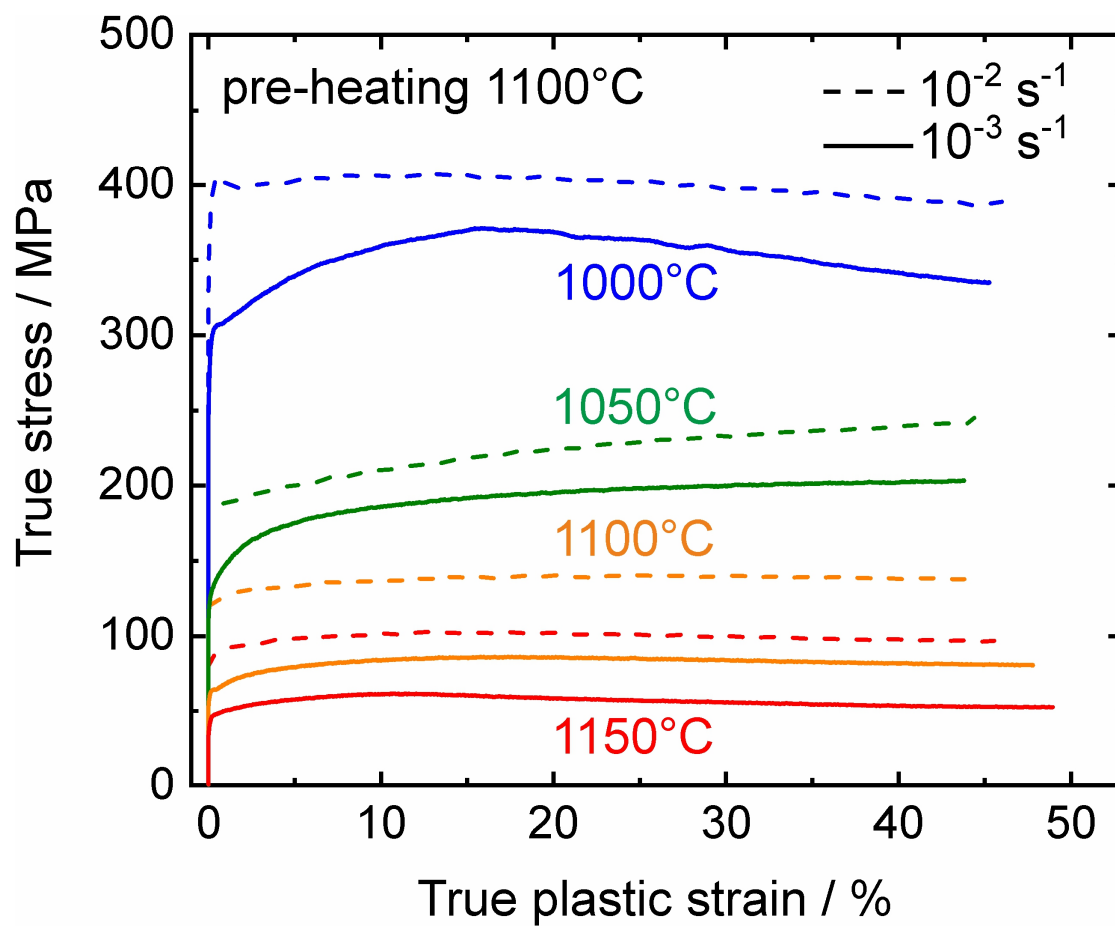

**Figure S1.** True stress as a function of true plastic strain at a pre-heating temperature of 1100 °C and different strain rates.
